# Supplementary material
Source: PubMed Central journal article supplement (PMC8423880)
Supplement: 13311_2020_998_MOESM2_ESM.pdf [file 13311_2020_998_MOESM2_ESM.pdf]

## Cuprizone behavioral test results

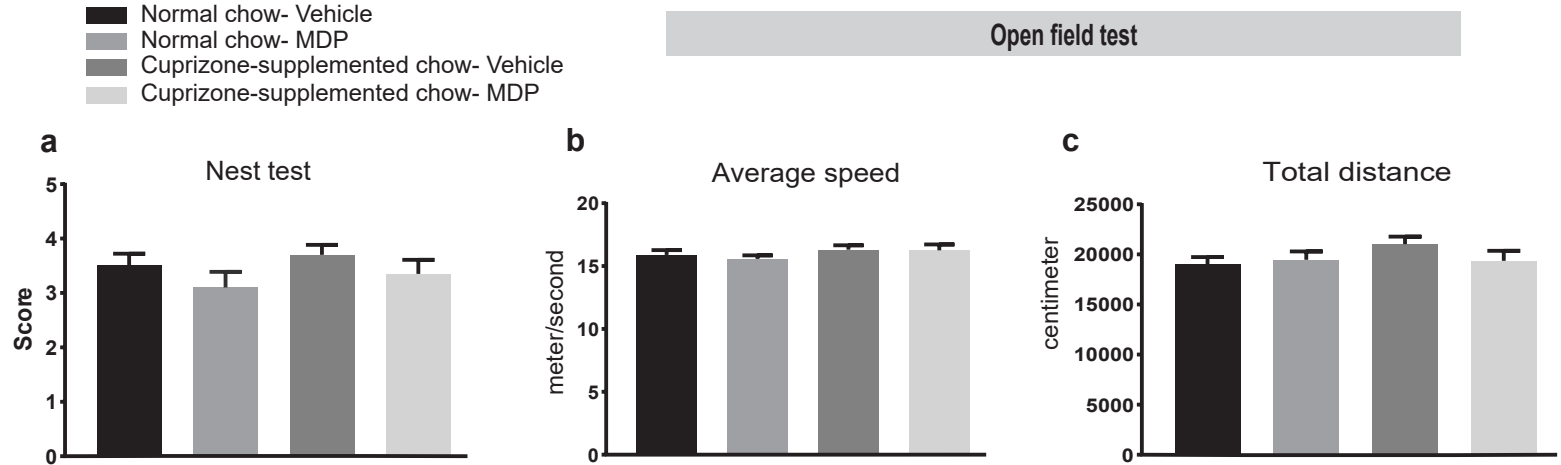

**Fig. S1** Cuprizone behavioral test results.

(a) Nest test score, and (b) and (c) average speed and total distance in open field test in fifth weeks in mice were fed with normal chow or cuprizone-supplemented chow for 5 weeks and treated with saline or MDP. No significant change was observed.
