# Supplementary material
Source: PubMed Central journal article supplement (PMC8423880)
Supplement: 13311_2020_998_MOESM3_ESM.pdf [file 13311_2020_998_MOESM3_ESM.pdf]

## Circulating T cell subsets 9 days post-immunization

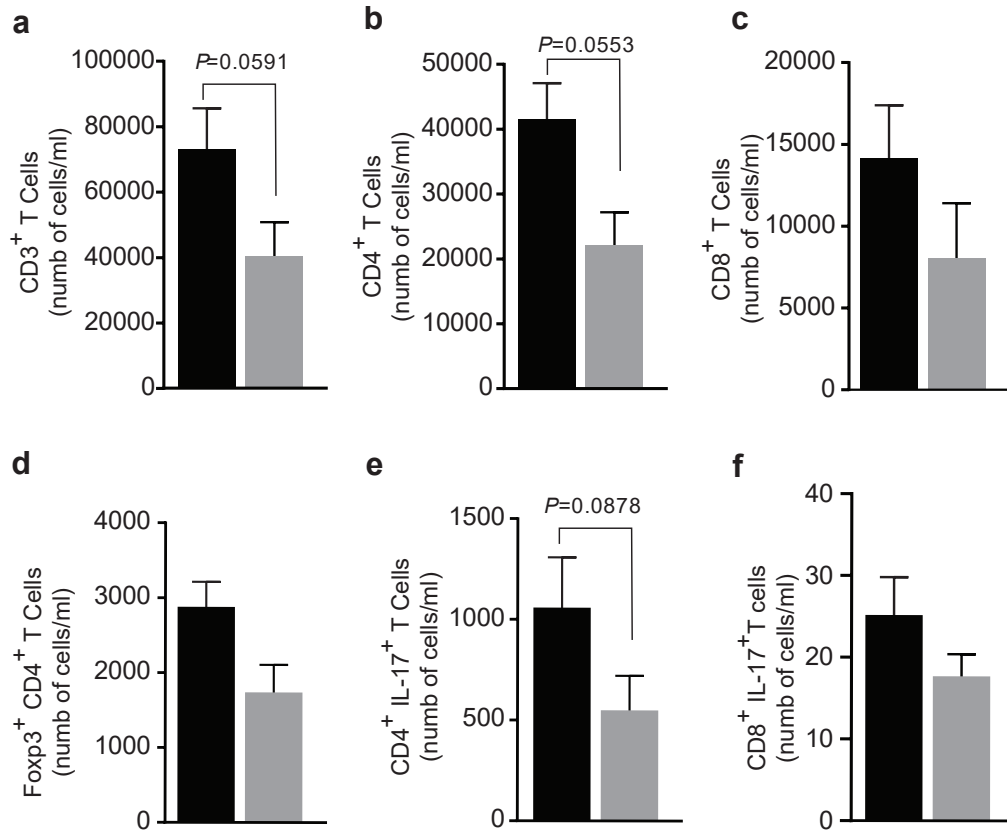

**Fig. S2** Flow cytometry results of circulating T cell subsets 9 days post-immunization.

(a), (b) and (c) Absolute count of blood CD3<sup>+</sup>, CD4<sup>+</sup>, and CD8<sup>+</sup> T cells respectively following treatment with vehicle or MDP in EAE mice as measured by FACS one-week post MDP injections (9 days post immunization). No significant change was observed.

(d), (e) and (f) Absolute count of blood Foxp3<sup>+</sup> CD4<sup>+</sup>, CD4<sup>+</sup> IL-17<sup>+</sup>, and CD8<sup>+</sup> IL-17<sup>+</sup> T cells respectively following treatment with vehicle or MDP in EAE mice as measured by FACS one-week post MDP injections (9 days post immunization). No significant change was observed.
