# Supplementary material
Source: PubMed Central journal article supplement (PMC8423880)
Supplement: 13311_2020_998_MOESM4_ESM.pdf [file 13311_2020_998_MOESM4_ESM.pdf]

## Circulating monocyte subsets 21 days post-immunization

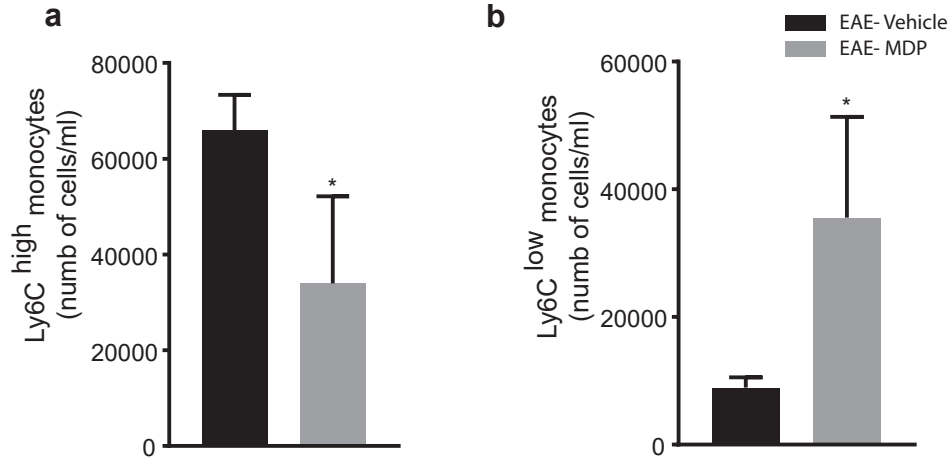

**Fig.S3** Flow cytometry results of circulating monocyte subsets 21 days post-immunization.

(a) and (b) Absolute count of blood Ly6C<sup>hi</sup> and Ly6C<sup>low</sup> monocytes respectively following treatment with vehicle or MDP in EAE mice as measured by FACS post MDP injections (21 days post-immunization).

Data are expressed as the means  $\pm$  SEM; \* $P < \text{or} = 0.04$  vs EAE-Vehicle.
