# Supplementary material
Source: PubMed Central journal article supplement (PMC8423880)
Supplement: 13311_2020_998_MOESM6_ESM.pdf [file 13311_2020_998_MOESM6_ESM.pdf]

## Circulating T cell subsets 21 days post-immunization

■ EAE-Vehicle  
■ EAE-MDP  
■ EAE/Nod2<sup>-/-</sup>- Vehicle  
■ EAE/Nod2<sup>-/-</sup>- MDP

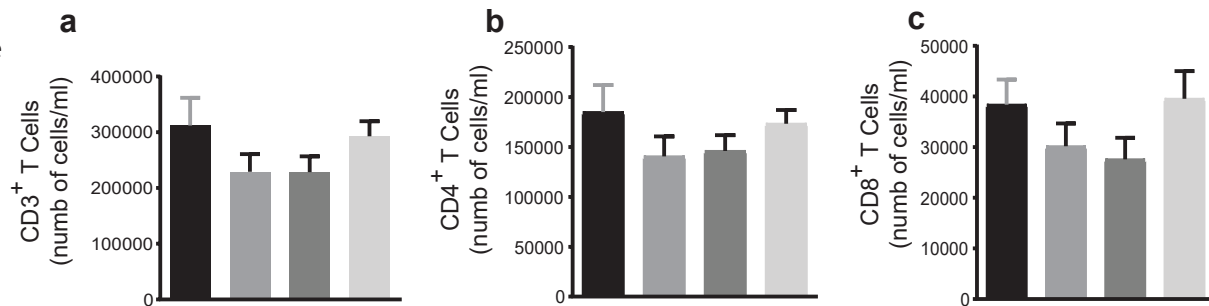

**Fig. S5** Flow cytometry results of circulating T cell subsets 9 days post-immunization in mice following NG-MDP treatment.

(a), (b) and (c) Absolute count of blood CD3<sup>+</sup>, CD4<sup>+</sup>, and CD8<sup>+</sup> T cells respectively following treatment with vehicle or NG-MDP in EAE mice as measured by FACS 9 days post immunization. No significant change was observed.
