# Supplementary material
Source: PubMed Central journal article supplement (PMC8423880)
Supplement: 13311_2020_998_MOESM7_ESM.pdf [file 13311_2020_998_MOESM7_ESM.pdf]

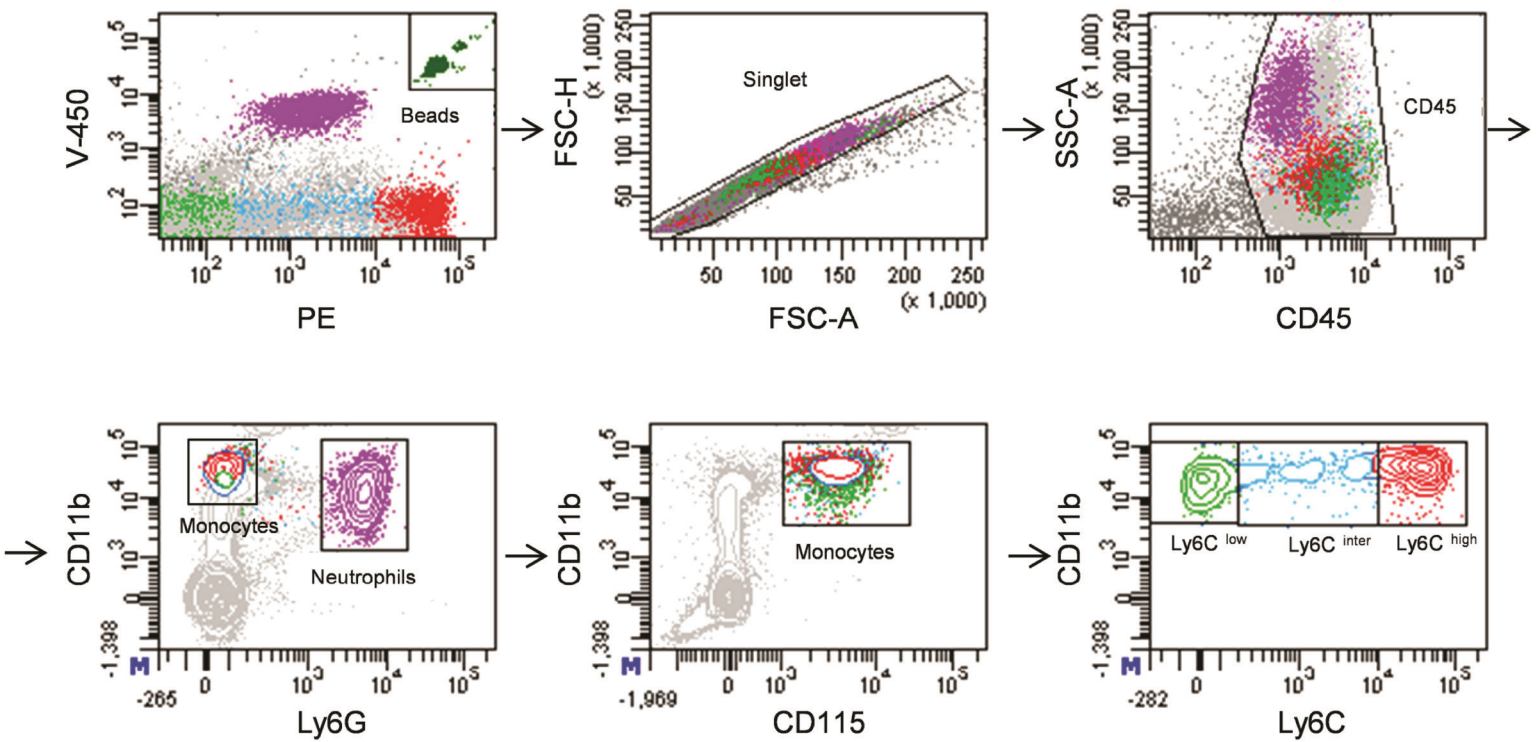

**Fig. S6** Flow cytometry gating strategy monocyte subsets used in all figures that presenting monocyte subsets modulation.

Representative gating strategy for  $CD11b^+$   $CD115^+$  monocytes and  $Ly6C$  monocyte subsets for all experiments and mouse models. To identify absolute counting of cell populations, 123count eBeads™ were gated. Bead population excluded and doublet discrimination are performed with a singlet gate (FSC-H/FSC-A dot blot). Dead/live analysis was performed for CNS samples (not shown). Next,  $CD45^+/CD11b^+/Ly6G^+$  cells were considered as neutrophils. Neutrophil cell population was gated out. Next monocytes were identified with  $CD45$ ,  $CD11b$  and  $CD115$  expression. Monocyte subsets were further subdivided in three populations based on the expression of  $Ly6C$ :  $Ly6C^{high}$ ,  $Ly6C^{int}$  and  $Ly6C^{low}$  which correspond respectively to inflammatory, intermediate and patrolling monocytes. Pictures were adopted from [1].
