# Supplementary material
Source: PubMed Central journal article supplement (PMC8423880)
Supplement: 13311_2020_998_MOESM8_ESM.pdf [file 13311_2020_998_MOESM8_ESM.pdf]

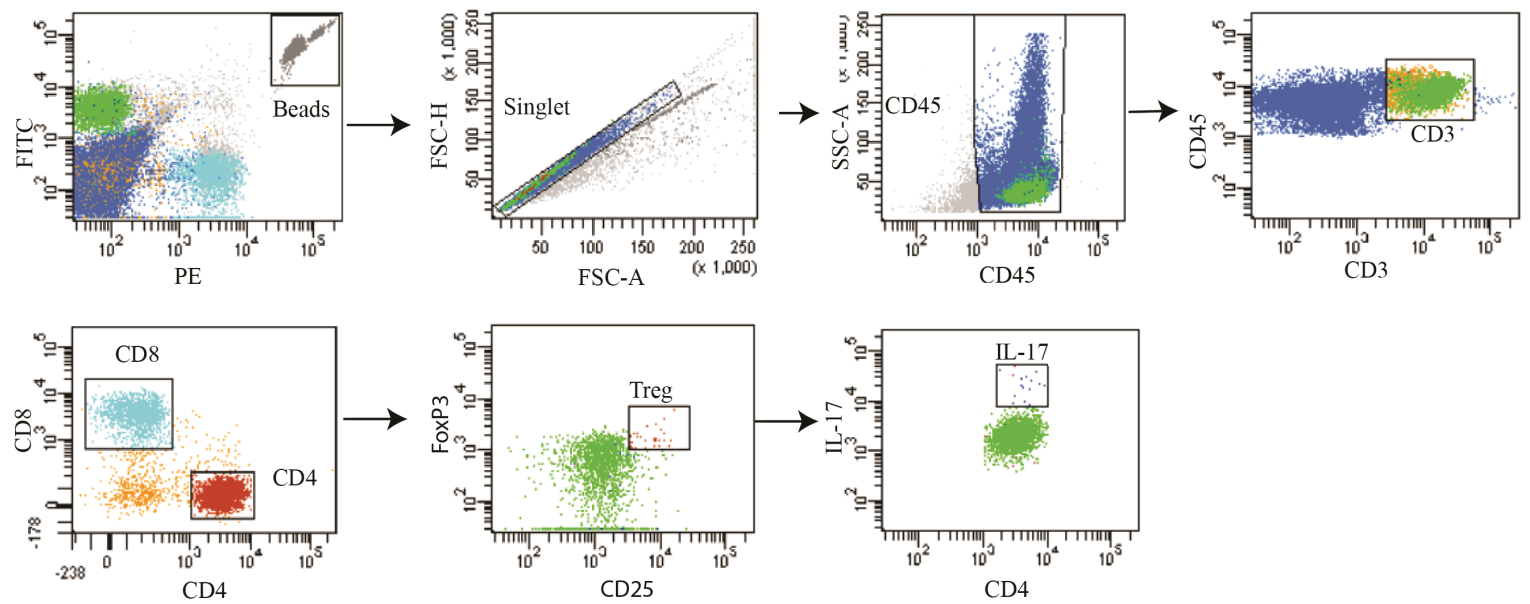

**Fig. S7** Flow cytometry gating strategy of T cell subsets used in all figures that presenting T cell subsets.

Representative gating strategy for T cell subsets for all experiments and mouse models.

To identify absolute counting of cell populations, 123count eBeads™ were gated. Bead population excluded and doublet discrimination are performed with a singlet gate (FSC-H/FSC-A dot blot). Dead/live analysis was performed for CNS samples (not shown). Next, CD45<sup>+</sup>/CD3<sup>+</sup> cells were considered as CD3<sup>+</sup>. CD3<sup>+</sup> were further subdivided in two populations based on the expression of CD4 and CD8. Next, Treg were identified with CD4<sup>+</sup>/Foxp3<sup>+</sup>/CD25 expressions. IL-17 was identified with CD4 and IL-17 expressions. IL-17<sup>+</sup> CD8<sup>+</sup> T cells were identified with the same strategy (not shown).
